# Supplementary material
Source: PubMed Central journal article supplement (PMC5001906)
Supplement: NIHMS786005-supplement-S1.pdf [file NIHMS786005-supplement-S1.pdf]

**Supporting information for:**

**Recognition of Poly-ubiquitins by the**

**Proteasome through Protein Re-folding Guided**

**by Electrostatic and Hydrophobic Interactions**

Yi Zhang,<sup>†,‡,ⓐ</sup> Lela Vuković,<sup>‡,¶,§,||,⊥,ⓐ</sup> Till Rudack,<sup>‡,ⓐ</sup> Wei Han,<sup>‡,#</sup> and Klaus  
Schulten<sup>\*,‡,†,¶,§</sup>

*†Center for Biophysics and Quantitative Biology*

*‡Beckman Institute*

*¶Department of Physics*

*§Center for the Physics of Living Cells, University of Illinois at Urbana-Champaign,  
Urbana, IL 61801, United States*

*||Department of Chemistry, University of Texas at El Paso, El Paso, TX 79968, United  
States*

*⊥Current address: Department of Chemistry, University of Texas at El Paso, El Paso, TX  
79968, United States*

*#Current address: Peking University, Shenzhen Graduate School, Shenzhen 518055, P.R.  
China*

*ⓐContributed equally to this work*

E-mail: kschulte@ks.uiuc.edu

Phone: 217-244-1604

**Table S1: List of simulations performed.**

| System (residues)                              | force field | time (ns) | replicas | system size (atoms) |
|------------------------------------------------|-------------|-----------|----------|---------------------|
| human S5a (196-306)                            | CHARMM22    | 200       | 1        | 75,000              |
| human S5a (196-306)                            | CHARMM27    | 200       | 1        | 75,000              |
| human S5a (196-306)                            | CHARMM36    | 200       | 1        | 75,000              |
| yeast Rpn10 (208-268)                          | CHARMM22    | 200       | 3        | 54,000              |
| <i>S. pombe</i> Rpn10 (190-243)                | CHARMM22    | 200       | 1        | 39,000              |
| human S5a (196-306):mono-ubiquitin             | CHARMM22    | 200       | 3        | 93,000              |
| yeast Rpn10 (208-268):mono-ubiquitin           | CHARMM22    | 200       | 3        | 72,000              |
| <i>S. pombe</i> Rpn10 (190-243):mono-ubiquitin | CHARMM22    | 200       | 3        | 70,000              |
| human S5a (196-306):K48-Ubq4 (Ubq1,Ubq2)       | CHARMM36    | 200       | 2        | 263,400             |
| human S5a (196-306):K48-Ubq4 (Ubq1,Ubq3)       | CHARMM36    | 200       | 1        | 200,700             |
| human S5a (196-306):K48-Ubq4 (Ubq1,Ubq4)       | CHARMM36    | 200       | 2        | 200,700             |
| human S5a (196-306):K48-Ubq2                   | CHARMM36    | 200       | 1        | 126,500             |
| human S5a (272-306):Ubq (Steered MD)           | CHARMM36    | 40        | 2        | 73,800              |

**Table S2: Comparison of simulated NOE pair distances with NMR data<sup>S1,S2</sup> for S5a/Rpn10 arm structures with and without ubiquitin bound.**

| Structures                            | $N_{\text{restraints}}$ (NMR) | $N_{\text{violated}}$ (MD) | % agreement |
|---------------------------------------|-------------------------------|----------------------------|-------------|
| S5a/Rpn10 arm (1YX4)                  | 98                            | 6                          | 93.9%       |
| S5a/Rpn10 arm : mono-ubiquitin (2KDE) | 2,928                         | 189                        | 93.5%       |

**Table S3: Experimentally determined  $K_d$  values for binding of 26S proteasome to different ubiquitin species and binding of human S5a to mono- and K48-linked diubiquitin.**

|                                                                         | $n_{ubq}$ | $K_d$ (nM) | $\Delta G$ (kcal/mol) |
|-------------------------------------------------------------------------|-----------|------------|-----------------------|
| K <sub>48</sub> -linked Ubq <sub>2</sub> : 26S Proteasome <sup>S3</sup> | 2         | 15,000     | -6.62                 |
| K <sub>48</sub> -linked Ubq <sub>3</sub> : 26S Proteasome <sup>S3</sup> | 3         | 1,933      | -7.84                 |
| K <sub>48</sub> -linked Ubq <sub>4</sub> : 26S Proteasome <sup>S3</sup> | 4         | 171        | -9.29                 |
| K <sub>48</sub> -linked Ubq <sub>6</sub> : 26S Proteasome <sup>S3</sup> | 6         | 52         | -10.00                |
| Ubq <sub>5</sub> (linear) : 26S Proteasome <sup>S3</sup>                | 5         | 539        | -8.60                 |
| Ubq <sub>1</sub> : (S5a UIM1) <sup>S1</sup>                             | 1         | 350,000    | -4.74                 |
| Ubq <sub>1</sub> : (S5a UIM1) <sup>S1</sup>                             | 1         | 73,000     | -5.68                 |
| K <sub>48</sub> -linked Ubq <sub>2</sub> : (S5a) <sup>S1</sup>          | 2         | 8,900      | -6.93                 |

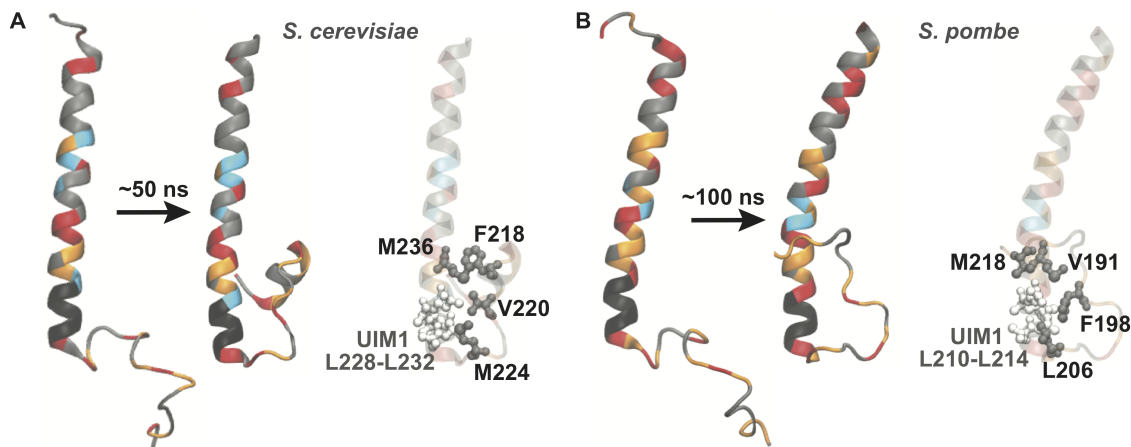

Figure S1: Properties of the flexible arm of the Rpn10 fragment in *S. cerevisiae* and *S. pombe* from MD simulations. A. The starting structure (left) and a representative structure (middle) of the Rpn10 fragment in *S. cerevisiae* from MD simulations, and the same structure highlighting interacting nonpolar residues/groups of the Rpn10 fragment on the right. Amino acids marked in red are negatively charged, blue are positively charged, orange are hydrophobic, black comprise UIM1, and grey cover the rest. B. The starting structure (left) and a representative structure (middle) of the Rpn10 fragment in *S. pombe* from MD simulations, and the same structure highlighting interacting nonpolar residues/groups of the Rpn10 fragment on the right. The color code is the same as in panel A.

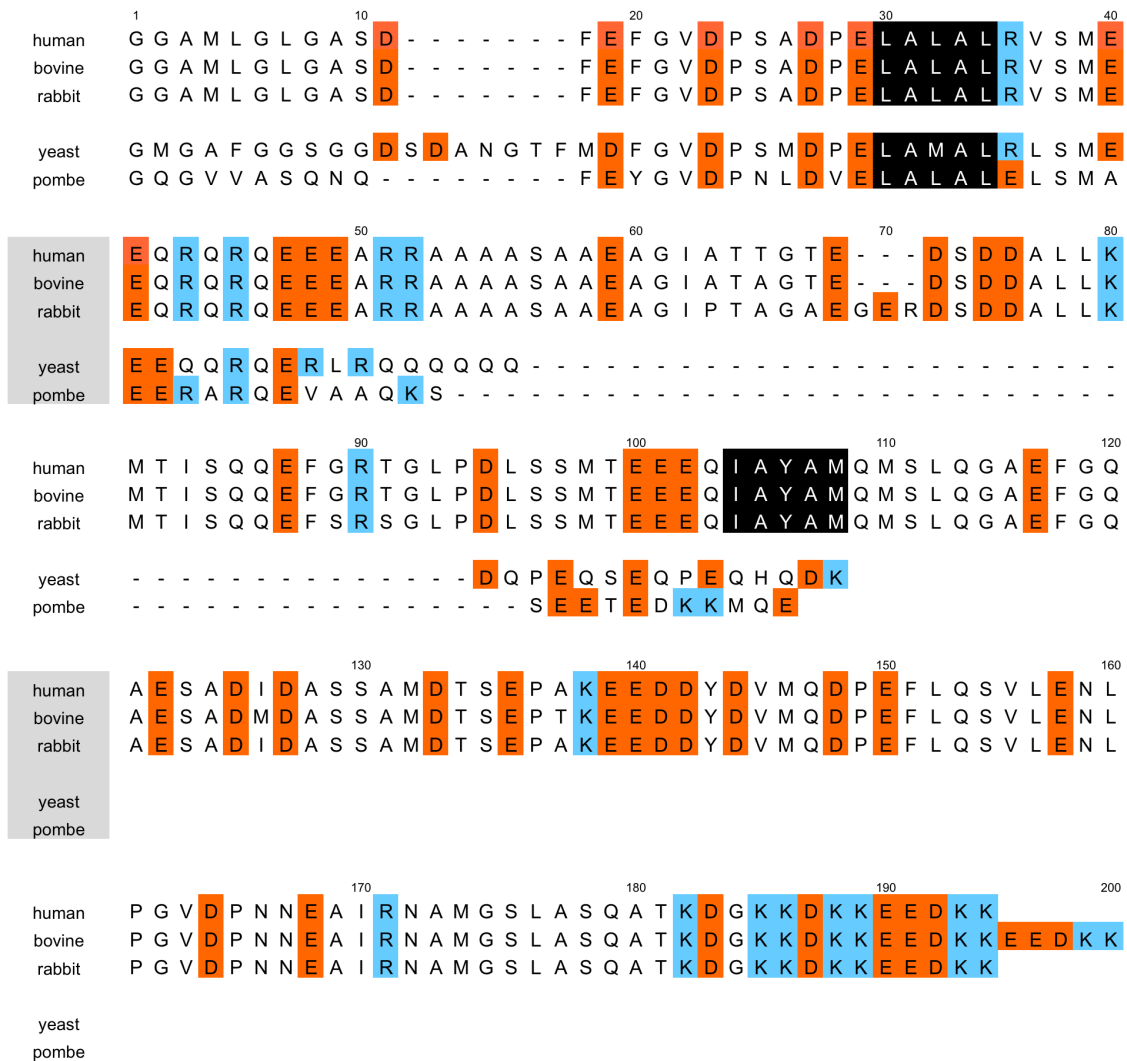

Figure S2: Aligned sequences of Rpn10 flexible arms of human, bovine, rabbit, *S. cerevisiae* and *S. pombe* species. The sequences of Rpn10 protein of human, bovine, rabbit, yeast, and *S. pombe* species correspond to UniProt<sup>S4</sup> codes P55036, Q58DA0, B7NZD2, P38886, and O94444, respectively.

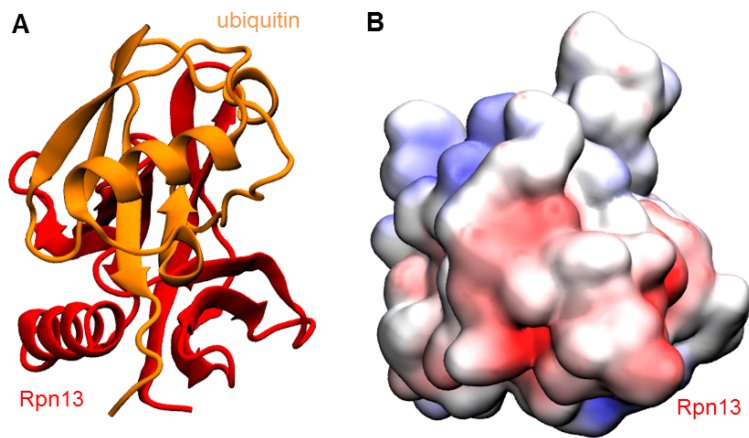

Figure S3: NMR structure of mouse Rpn13 bound to mono-ubiquitin (pdbID: 2Z59). A. Cartoon representation of the Rpn13-mono-ubiquitin complex. B. Surface of Rpn13 colored according to electrostatic potential, shown in the same orientation as in panel A; ubiquitin is removed to reveal the potential of the Rpn13-ubiquitin binding surface. The color scale of the electrostatic potential is the same as in Fig. 3 (in  $k_B T/e$  units).

## References

- (S1) Zhang, N.; Wang, Q.; Ehlinger, A.; Randles, L.; Lary, J. W.; Kang, Y.; Haririnia, A.; Storaska, A. J.; Cole, J. L.; Fushman, D.; Walters, K. J. Structure of the S5a: K48-Linked Diubiquitin Complex and Its Interactions with Rpn13. *Mol. Cell* **2009**, *35*, 280–290.
- (S2) Wang, Q.; Young, P.; Walters, K. J. Structure of S5a Bound to Monoubiquitin Provides a Model for Polyubiquitin Recognition. *J. Mol. Biol.* **2005**, *348*, 727–739.
- (S3) Thrower, J. S.; Hoffman, L.; Rechsteiner, M.; Pickart, C. M. Recognition of the Polyubiquitin Proteolytic Signal. *EMBO J.* **2000**, *19*, 94–102.
- (S4) Consortium, T. U. UniProt: A Hub for Protein Information. *Nucl. Acids Res.* **2015**, *43*, D204–D212.
